# Supplementary material
Source: MDPI journal article supplement (https://www.mdpi.com/2076-3417/8/10/1768)
Supplement: s1 [file s1]

# Supplementary Materials: Leveraging Known Data for Missing Label Prediction in Cultural Heritage Context

Abdelhak Belhi <sup>1,2,\*</sup>, Abdelaziz Bouras <sup>1</sup> and Sebti Foufou <sup>3</sup>

The research work discussed within this paper is part of a project called CEPROQHA. The datasets discussed within the paper are publicly available following the links below:

1. The WikiArt dataset: <https://www.wikiart.org/>
2. The Met dataset: <https://github.com/metmuseum/openaccess>
3. The Rijksmuseum dataset (API): <http://rijksmuseum.github.io/>

Additional materials related to the paper will be hosted soon following this link: <https://www.ceproqha.qa/research/multimodal-classification/index.html>
